# Supplementary material
Source: Royal Society of Chemistry journal article supplement (doi:10.1039/d6fo01144f)
Supplement: d6fo01144f1.pdf [file d6fo01144f1.pdf]

**Supplementary Table 1.** This table includes all primers used in RT-qPCR experiments.

| Gene          | Gene ID | Direction | Primer sequences (5' - 3' ) |
|---------------|---------|-----------|-----------------------------|
| <i>action</i> | 181097  | Forward   | GATGTCGCCGAGGAGAAGCAAC      |
|               |         | Reverse   | ACTGGGGTAGAGTGGAGCTTGG      |
| <i>ctl-1</i>  | 259738  | Forward   | GCGGATACCGTACTCGTGAT        |
|               |         | Reverse   | GTGGCTGCTCGTAGTTGTGA        |
| <i>ctl-2</i>  | 175085  | Forward   | TCCGTGACCCTATCCACTTC        |
|               |         | Reverse   | TGGGATCCGTATCCATTCAT        |
| <i>ctl-3</i>  | 175086  | Forward   | GCGGATACCGTACTCGTGAT        |
|               |         | Reverse   | GTGGCTGCTCGTAGTTGTGA        |
| <i>sod-1</i>  | 174141  | Forward   | CGTAGGCGATCTAGGAAATGTG      |
|               |         | Reverse   | AACAACCATAGATCGGCCAACG      |
| <i>sod-2</i>  | 172632  | Forward   | CTTCAAACACCGTTCGCTG         |
|               |         | Reverse   | CAGTGGAACAAGTCCAGTT         |
| <i>sod-3</i>  | 181748  | Forward   | TTCAAAGGAGCTGATGGACACT      |
|               |         | Reverse   | AAGTGGGACCATTCCCTCCAA       |
| <i>gst-4</i>  | 177886  | Forward   | GATGCTCGTGCTCTTGCTG         |
|               |         | Reverse   | CCGAATTGTTCTCCATCGAC        |
| <i>gst-7</i>  | 173842  | Forward   | GGACAAGACTTCGAGGACAAC       |
|               |         | Reverse   | AACTGACGAGCCAAGTAACG        |
| <i>gst-10</i> | 178725  | Forward   | AAGAGATTGTGCAGACTGGAG       |
|               |         | Reverse   | AGAACATGTCGAGGAAGGTTG       |
| <i>nhr-49</i> | 172839  | Forward   | CGGTGTCGGATCAAACGGTA        |
|               |         | Reverse   | GAAGTTGTCGCATTGGCCAG        |
| <i>fat-5</i>  | 180162  | Forward   | GCTCTACACATTGGAGCCCT        |
|               |         | Reverse   | GTGTGCAGGAGGAATACCCA        |
| <i>fat-6</i>  | 178122  | Forward   | AGAGGAGAGCAAGAAGATCCCA      |
|               |         | Reverse   | TCACGGTTTGCCATTTGCC         |

|              |        |         |                      |
|--------------|--------|---------|----------------------|
| <i>fat-7</i> | 179100 | Forward | CGCAGCCATTGGACTTTACG |
|              |        | Reverse | CTGTTGATGCACCAAGTGGC |

**Supplementary Table 2.** Effect of different bacteria on the lifespan of *C. elegans* under different stressors

| Injury mode      | Group | N  | Mean lifespan (h/days) ±SEM | % of control | Maximum lifespan(hours) | P value           |
|------------------|-------|----|-----------------------------|--------------|-------------------------|-------------------|
| oxidative stress | OP50  | 75 | 1.50 ± 0.50 <sup>a</sup>    | 100.0        | 4                       | -                 |
|                  | LS232 | 76 | 2.50 ± 0.50 <sup>b</sup>    | 140.0        | 5                       | <i>P</i> = 0.0092 |
| Metal stress     | OP50  | 70 | 12.33 ± 0.58 <sup>a</sup>   | 100.0        | 21                      | -                 |
|                  | LS232 | 75 | 14.00 ± 1.00 <sup>b</sup>   | 111.9        | 23                      | <i>P</i> = 0.0087 |
| Osmotic stress   | OP50  | 72 | 2.00 ± 0.50 <sup>a</sup>    | 100.0        | 5                       | -                 |
|                  | LS232 | 76 | 3.15 ± 0.58 <sup>b</sup>    | 136.5        | 7                       | <i>P</i> = 0.0038 |

Three replicates were carried out. Values with different letters in column are significantly different ( $p < 0.05$ ). Significant differences were analyzed by log-rank (Mantel–Cox) tests.

**Supplementary Table 3.** Effect of different bacteria on the lifespan of *nhr-49(nr2041)* mutant

| Strain                | Group | N  | Mean lifespan (days)     | Maximum lifespans | Genetic requirement |
|-----------------------|-------|----|--------------------------|-------------------|---------------------|
| <i>nhr-49(nr2041)</i> | OP50  | 70 | 9.00 ± 1.00 <sup>a</sup> | 16                | NO                  |
|                       | LS232 | 73 | 9.50 ± 0.87 <sup>a</sup> | 16                |                     |

Three replicates were carried out. Values with different letters in column are significantly different
